# Supplementary material for: Ni@TiO2 nanoribbon array electrode for high-efficiency non-enzymatic glucose biosensing
Source: Royal Society of Chemistry journal article supplement (doi:10.1039/d4tb01721h), 2024-01-01
Supplement: d4tb01721h1.pdf [file d4tb01721h1.pdf]

## Electronic Supplementary Information

### Experimental section

**Materials:** Sodium hydroxide (NaOH, >96%), nickel nitrate ( $\text{Ni}(\text{NO}_3)_2$ , 99.9%), potassium chloride (KCl, >99.5%), hydrochloric acid (HCl, 12 M), and ethanol (99%) were obtained from Beijing Chemical Reagent Co. Ltd. Glucose (99.99%), ascorbic acid (AA, >99.99%), sodium chloride (NaCl, >99.5%), calcium chloride ( $\text{CaCl}_2$ , >99.5%), uric acid (UA, >99.99%), dopamine (DA, >99%), and gibberellic acid (GA, >99%) were acquired from Aladdin Ltd. All reagents are analytical grade. Titanium plate (TP) (0.4 mm thick) was supplied by China Qingyuan Metal Materials Co. Ltd.

**Ni@TiO<sub>2</sub>/TP synthesis:** Initially, TP underwent ultrasonic treatment in HCl, ethanol, and water for 10 min each. Following our previous work<sup>1-4</sup>, the treated TP was then soaked in 5 M NaOH and heated at 180°C in an autoclave for 24 h to obtain sodium titanate/TP. Next, sodium titanate/TP was immersed in 0.05 M  $\text{Ni}(\text{NO}_3)_2$  to exchange  $\text{Na}^+$  for  $\text{Ni}^{2+}$ . After rinsing and drying, it was annealed at 500°C under an Ar/H<sub>2</sub> atmosphere for 2 h, resulting in Ni@TiO<sub>2</sub>/TP. For comparison, TiO<sub>2</sub>/TP was synthesized similarly, using dilute HCl instead of  $\text{Ni}(\text{NO}_3)_2$  to exchange  $\text{Na}^+$  for  $\text{H}^+$ .

**Characterizations:** X-ray diffraction (XRD) analyses were conducted using a Rigaku D/MAX 2550 diffractometer. X-ray photoelectron spectroscopy (XPS) measurements were performed with a Thermo Scientific K-Alpha spectrometer, utilizing magnesium (Mg) for excitation. Scanning electron microscope (SEM) images were equipped with a Hitachi S-4800 field emission microscope. Transmission electron microscopy was carried out using an FEI Talos F200x microscope.

**Electrochemical measurements:** The electrochemical performance of Ni@TiO<sub>2</sub>/TP and TiO<sub>2</sub>/TP (0.2 ~ 0.5 cm) electrodes was studied using a conventional three-electrode system on a Chi660E electrochemical workstation. A platinum wire served as the counter electrode, an Ag/AgCl electrode as the reference, and the prepared Ni@TiO<sub>2</sub>/TP electrode as the working electrode. Cyclic voltammetry (CV) scans were performed within a potential range of 0.2 to 0.6 V. Glucose sensing via chronoamperometry (CA) was conducted at 0.50 V, with 0.1 M NaOH as the

electrolyte for both CV and CA measurements. All potentials were referenced to the Ag/AgCl electrode without correction.

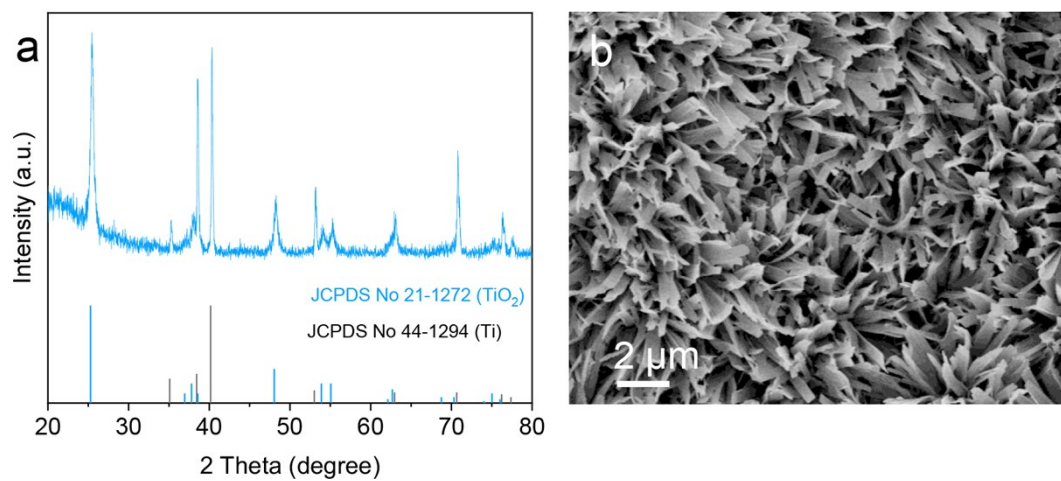

**Fig. S1.** (a) XRD pattern and (b) SEM image of TiO<sub>2</sub>/TP.

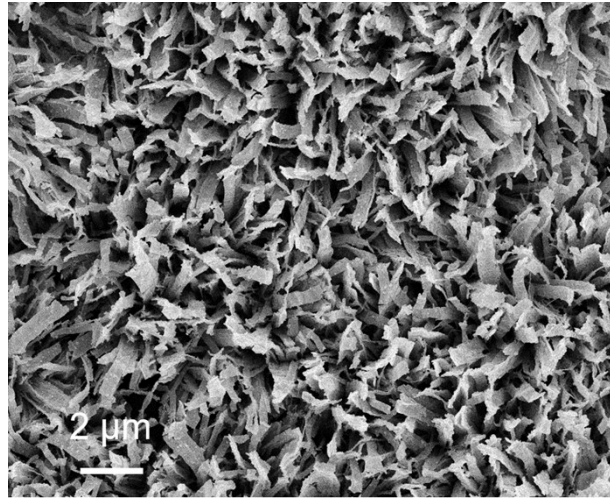

**Fig. S2.** SEM image of Ni@TiO<sub>2</sub>/TP

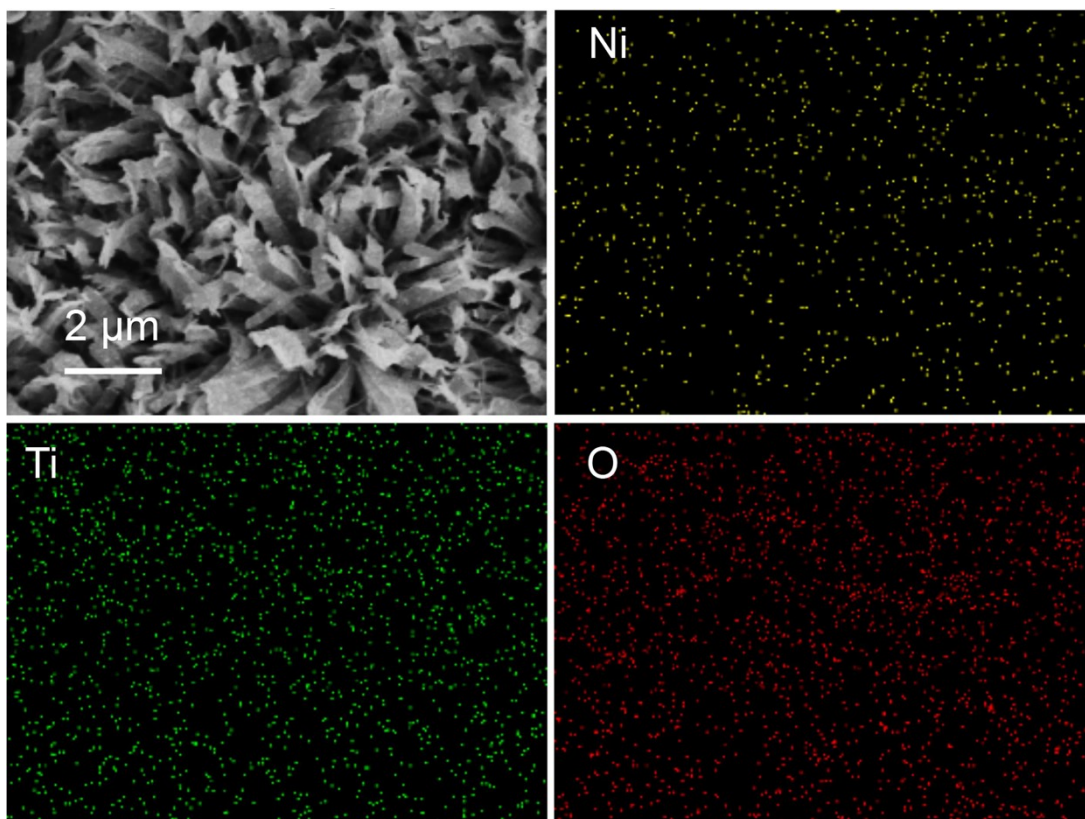

**Fig. S3.** SEM and corresponding EDX elemental mapping images of Ni@TiO<sub>2</sub>.

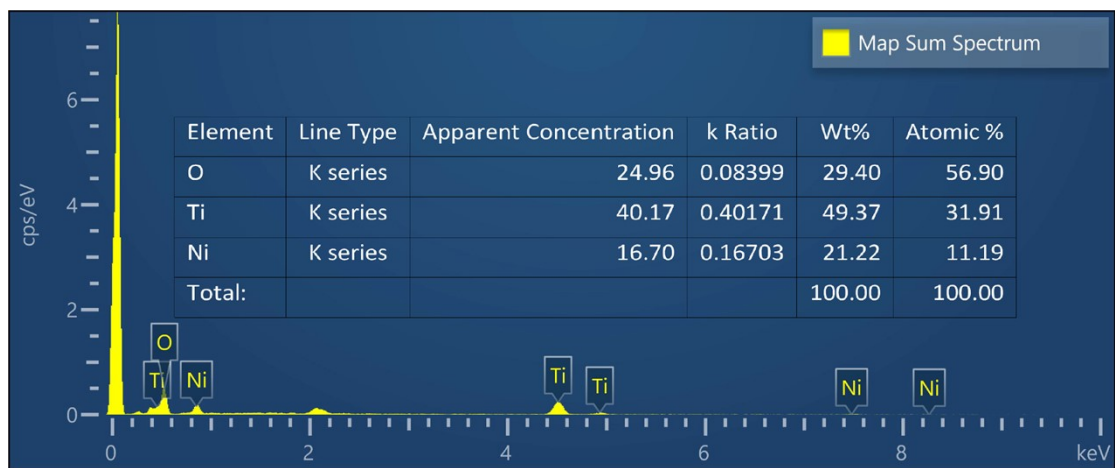

**Fig. S4.** EDX spectrum of Ni@TiO<sub>2</sub>.

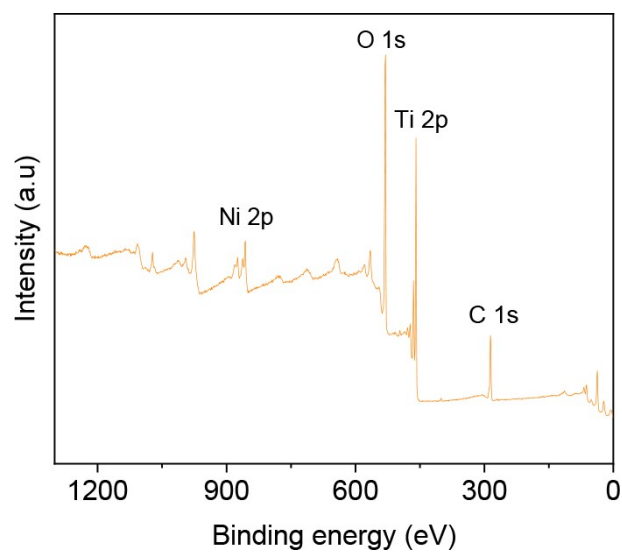

**Fig. S5.** XPS survey spectrum of Ni@TiO<sub>2</sub>.

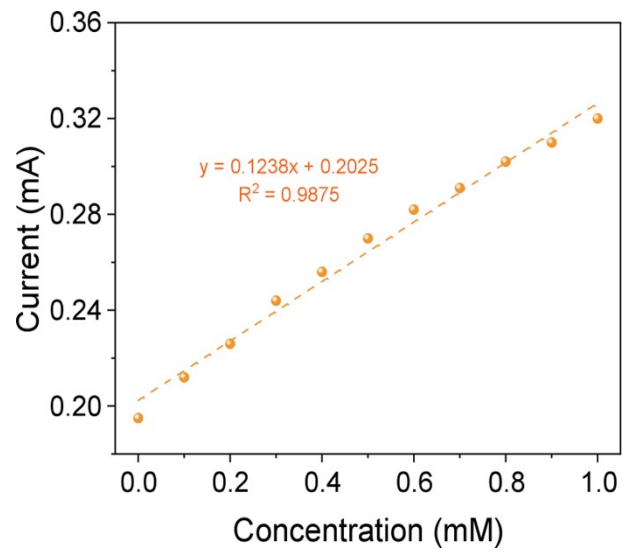

**Fig. S6.** Plot of the current vs. the concentration of glucose for Ni@TiO<sub>2</sub>/TP.



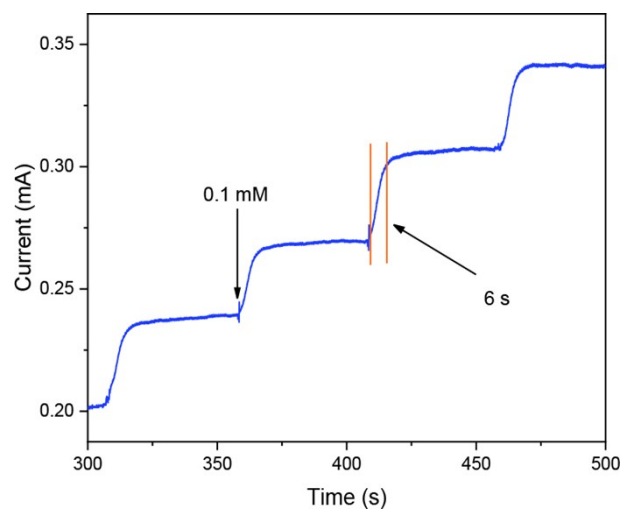

**Fig. S7.** Current response time of Ni@TiO<sub>2</sub>/TP.

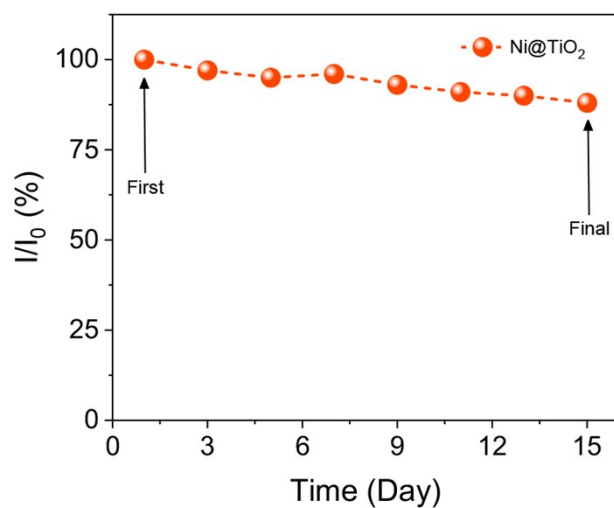

**Fig. S8.** Relative current response of the Ni@TiO<sub>2</sub>/TP electrode towards 0.1 mM glucose after 15 days of storage.

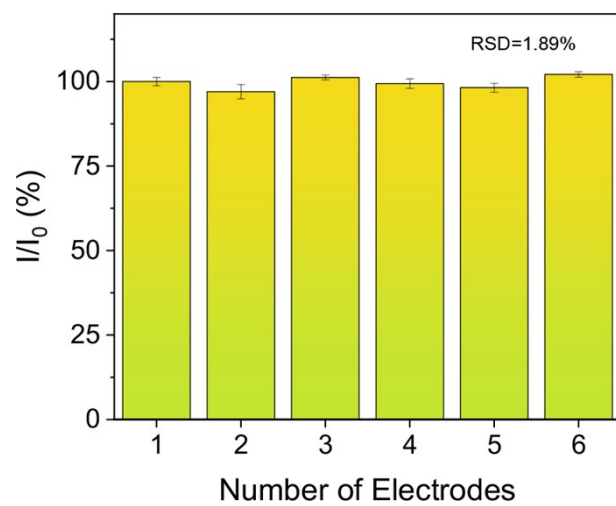

**Fig. S9.** Inter-electrode repeatability of Ni@TiO<sub>2</sub>/TP.

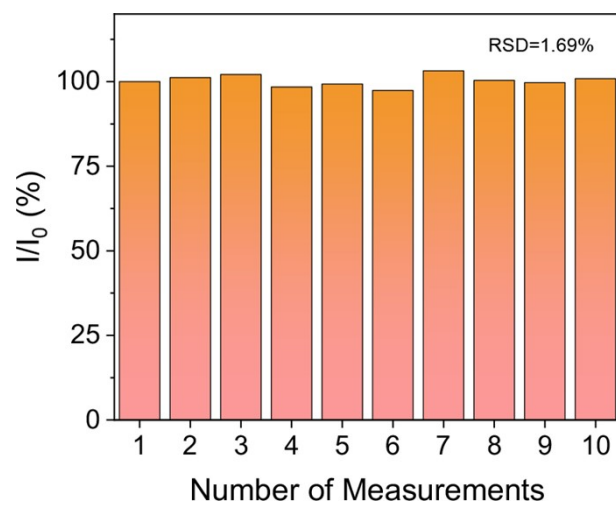

**Fig. S10.** Intra-electrode repeatability of Ni@TiO<sub>2</sub>/TP.

**Table S1.** Comparison of the performances of Ni@TiO<sub>2</sub>/TP with other reported non-enzymatic electrode for glucose detection.

| Electrodes                                                                                    | Sensitivity<br>( $\mu\text{A mM}^{-1}\text{cm}^{-2}$ ) | Linger range<br>(mM) | LOD<br>( $\mu\text{M}$ ) | Ref.             |
|-----------------------------------------------------------------------------------------------|--------------------------------------------------------|----------------------|--------------------------|------------------|
| Ni@TiO <sub>2</sub> /TP                                                                       | <b>10060</b><br><b>3940</b>                            | <b>0.001-1</b>       | <b>0.08</b>              | <b>This work</b> |
| Ni-TiO <sub>2</sub> /XC72R                                                                    | 3300<br>273.7                                          | 0.05-1<br>1-20       | 0.144                    | 5                |
| NiO-TiO <sub>2</sub> /GCE                                                                     | 24.85                                                  | 0.002-2              | 0.7                      | 6                |
| Ni(OH) <sub>2</sub> /TiO <sub>2</sub>                                                         | 192                                                    | 0.03-14              | 8                        | 7                |
| NPs/TiO <sub>2</sub> NTs                                                                      | 700                                                    | 0.004-4.8            | 2                        | 8                |
| WO <sub>3</sub> doped TiO <sub>2</sub><br>nanotubes with<br>Ni(OH) <sub>2</sub> nanoparticles | 70                                                     | /                    | 28                       | 9                |
| Ni-MOF NSAs/CC                                                                                | 13428.89                                               | 0.001-7              | 0.57                     | 10               |
| Conductive Ni-MOF                                                                             | 21744                                                  | 0.001-8              | 0.66                     | 11               |
| Ni-DLC/TiO <sub>2</sub>                                                                       | 1063.78                                                | 0.99-22.9            | 0.53                     | 12               |
| Ni/rGO/PP                                                                                     | /                                                      | 0.0005-1             | 0.36                     | 13               |
| NiCo-LDH/MWCNTs                                                                               | 2.55<br>1.15                                           | 0.0001-3<br>3-9.23   | 0.03                     | 14               |

**Table S2.** Recovery tests for Ni@TiO<sub>2</sub>/TP glucose biosensor in human blood serum and cell culture fluid.

| Sample             | Added (mM) | Found (mM) | Recovery (%) | RSD (%) (n=3) |
|--------------------|------------|------------|--------------|---------------|
| Human blood serum  | 0.1        | 0.097      | 97.4         | 1.5           |
|                    | 0.3        | 0.294      | 98.3         | 2.7           |
|                    | 0.5        | 0.508      | 101.5        | 2.2           |
| Cell culture fluid | 0.1        | 0.096      | 96.1         | 3.4           |
|                    | 0.3        | 0.307      | 102.3        | 2.1           |
|                    | 0.5        | 0.494      | 98.8         | 4.2           |

## References

- 1 X. Fan, D. Zhao, Z. Deng, L. Zhang, J. Li, Z. Li, S. Sun, Y. Luo, D. Zheng, Y. Wang, B. Ying, J. Zhang, A. A. Alshehri, Y. Lin, C. Tang, X. Sun and Y. Zheng, *Small*, 2023, **19**, 2208036.
- 2 K. Dong, Y. Yao, H. Li, H. Li, S. Sun, X. He, Y. Wang, Y. Luo, D. Zheng, Q. Liu, Q. Li, D. Ma, X. Sun and B. Tang, *Nat. Synth.*, 2024, **3**, 763–773.
- 3 J. Liang, P. Liu, Q. Li, T. Li, L. Yue, Y. Luo, Q. Liu, N. Li, B. Tang, A. A. Alshehri, I. Shakir, P. O. Agboola, C. Sun and X. Sun, *Angew. Chem. Int. Edit.*, 2022, **61**, e202202087.
- 4 P. Wu, J. Fan, Y. Tai, X. He, D. Zheng, Y. Yao, S. Sun, B. Ying, Y. Luo, W. Hu, X. Sun and Y. Li, *Food Chem.*, 2024, **447**, 139018.
- 5 J. P. de los Rios, V. Galvan and G. K. S. Prakash, *ECS Adv.*, 2023, **2**, 026502.
- 6 S. Rajendran, D. Manoj, K. Raju, Dionysios. D. Dionysiou, Mu. Naushad, F. Gracia, L. Cornejo, M. A. Gracia-Pinilla and T. Ahamad, *Sensor. Actuat. B-Chem.*, 2018, **264**, 27–37.
- 7 A. Gao, X. Zhang, X. Peng, H. Wu, L. Bai, W. Jin, G. Wu, R. Hang and P. K. Chu, *Sensor. Actuat. B-Chem.*, 2016, **232**, 150–157.
- 8 S. Yu, X. Peng, G. Cao, M. Zhou, L. Qiao, J. Yao and H. He, *Electrochim. Acta*, 2012, **76**, 512–517.
- 9 S. Sharma, S. K. Ganeshan, S. Kundu and K. N. Chappanda, *IEEE T. Nanotechnol.*, 2021, **20**, 185–193.
- 10 Y. Qiao, R. Zhang, F. He, W. Hu, X. Cao, J. Jia, W. Lu and X. Sun, *New J. Chem.*, 2020, **44**, 17849–17853.
- 11 Y. Qiao, Q. Liu, S. Lu, G. Chen, S. Gao, W. Lu and X. Sun, *J. Mater. Chem. B*, 2020, **8**, 5411–5415.
- 12 Y. Kang, X. Ren, Y. Li and Z. Yu, *Molecules*, 2022, **27**, 5815.
- 13 Z. Li, Z. Chen, X. Ji, H. Jin, Y. Si, J. Zhang, C. Chen and D. He, *Nano Res.*, 2024, **17**, 6258–6264.

- 14 Y. Zhu, J. Qian, K. Xu, W. Ouyang, J. Yang and N. Yang, *Chem. Eng. J.*, 2024, **485**, 149795.
